# Supplementary material for: Renal replacement treatment initiation with twice-weekly versus thrice-weekly haemodialysis in patients with incident dialysis-dependent kidney disease: rationale and design of the TWOPLUS pilot clinical trial
Source: PubMed Central journal article supplement — BMJ Open. 2021 May 24;11(5):e047596. doi: 10.1136/bmjopen-2020-047596 (PMC8149445; doi:10.1136/bmjopen-2020-047596), 2021-05-24
Supplement: bmjopen-2020-047596supp001.pdf [file bmjopen-2020-047596supp001.pdf]

**Supplementary Table 1: Formulas and equations that will be used during the study**

- **Residual Renal Urea Clearance,  $K_{r,urea}$  (mL/min)** =  $[(\text{urine urea conc. (mmol/L)} \times \text{urine volume (mL)}) / ((\text{BUN1} + \text{BUN2}) / 2) \text{ (mmol/L)} \times \text{period of urine collection (min)}]$

where BUN1 is the BUN concentration in a blood sample collected immediately after the HD session that preceded the collection interval, BUN2 is the BUN concentration in a sample collected before the next HD session.

- **Weekly Residual Renal Urea Clearance ( $K_{r,t}/V_{urea}$ ):**
  - a) Calculate  $K_{r,urea}$  in liters/week =  $K_{r,urea}$  in mL/min  $\times$  10.08 (to convert mL/min to liters/week)
  - b)  $t = 1$  week
  - c)  $V$  (total body water): calculate from the Watson formula:

For men:  $V(L) = 2.447 + (0.3362 \times \text{Weight [kg]}) + (0.1074 \times \text{Height [cm]}) - (0.09516 \times \text{Age})$

For women:  $V(L) = -2.097 + (0.2466 \times \text{Weight [kg]}) + (0.1069 \times \text{Height [cm]})$

- **Residual Renal Creatinine Clearance (mL/min)** =  $[(\text{urine creatinine conc. (mmol/L)} \times \text{urine volume (mL)}) / ((\text{Scr1} + \text{Scr2}) / 2) \text{ (mmol/L)} \times \text{period of urine collection (min)}]$

where Scr1 is the serum creatinine concentration in a blood sample collected immediately after the HD session that preceded the collection interval, Scr2 is the serum creatinine concentration in a sample collected before the next HD session

- **Residual Renal Urea Clearance (mL/min/1.73m<sup>2</sup>)** =  $K_{r,urea}$  (mL/min)  $\times$  1.73/BSA
- **Residual Renal Creatinine Clearance (mL/min/1.73m<sup>2</sup>)** =  $K_{r,creatinine}$  (mL/min)  $\times$  1.73/BSA
- **Residual Kidney Function (RKF) (mL/min/1.73m<sup>2</sup>)** = (Residual Renal Urea Clearance (mL/min/1.73m<sup>2</sup>) + Residual Renal Creatinine Clearance (mL/min/1.73m<sup>2</sup>))/2
- **Renal B2MG Clearance (mL/min)** =  $((\text{Urine B2MG concentration [mg/L]} \times \text{Urine volume [mL]}) / (\text{serum2 B2MG} + \text{serum1 B2MG [mg/L]}) / 2) \times \text{period of urine collection (min)}$

where serum1 B2MG is the B2MG concentration in a blood sample collected immediately after the HD session that preceded the collection interval, serum2 B2MG is the B2MG concentration in a sample collected before the next HD session

- **Renal B2MG Clearance at baseline (mL/min)** based on 24-hour urine collection, prior to HD initiation =  $((\text{Urine B2MG concentration [mg/L]} \times \text{Urine volume [mL]}) / \text{serum B2MG [mg/L]}) \times 1440$

where serum B2MG is the solute concentration in the blood collected at baseline, before HD initiation

- **Normalized protein catabolic rate (nPCR)** will be calculated using formula<sup>33</sup>:

$nPCR \text{ (g/kg/day)} = 149.7 \times G/V + 0.17$ , where  $G/V = [BUN2(V+W)/V - BUN1 + (U_v \times U_c/V)]/idi$

where BUN1 is the post-dialysis BUN concentration (mmol/L), BUN2 is the pre-dialysis blood urea concentration (mmol/L), W is the interdialytic weight gain (grams), V is the total body water (L),  $U_v$  is the volume of interdialytic urine collection (mL),  $U_c$  is the urea concentration in interdialytic urine collection (mmol/L), and  $idi$  is the interdialytic interval (minutes).

Pre-dialysis blood samples will be drawn before injecting saline, heparin, or other potential diluents. Post-dialysis blood samples will be drawn from the dialyzer inflow port using a slow-flow method (100 mL/min for 15 seconds)<sup>1</sup>.

Abbreviations: BUN, blood urea nitrogen; B2MG, beta-2 microglobulin; BSA, body surface area; SCr, serum creatinine; UCC, urine creatinine concentration; UUC, urine urea concentration.

| <b>Supplementary Table 2. Secondary outcomes measurements</b> |                                                                                                                                                                                                                                                                                                                                  |
|---------------------------------------------------------------|----------------------------------------------------------------------------------------------------------------------------------------------------------------------------------------------------------------------------------------------------------------------------------------------------------------------------------|
| <b>Outcome</b>                                                | <b>Measurements</b>                                                                                                                                                                                                                                                                                                              |
| Change in RKF                                                 | Difference in changes in RKF from baseline to set time points post-randomization.                                                                                                                                                                                                                                                |
| Volume management                                             | Inter-dialytic weight gain (expressed as percentage [%] of estimated dry weight), residual weight (post-dialysis weight – estimated dry weight; expressed as % of estimated dry weight), ultrafiltration rate (mL/kg/hour), and intra-dialytic peak and nadir systolic blood pressure.                                           |
| Hospitalization                                               | All hospitalizations, cause of hospitalization, hospital length of stay, time to first hospitalization and 30-day readmission rate.                                                                                                                                                                                              |
| Solute clearance                                              | spKdt/Vurea, stdKdt/Vurea, weekly Krt/Vurea, total weekly Kt/Vurea, and renal clearance for beta 2 microglobulin.                                                                                                                                                                                                                |
| Electrolyte and acid-base homeostasis                         | Average levels of serum potassium, serum sodium and serum bicarbonate levels.                                                                                                                                                                                                                                                    |
| Nutrition                                                     | Average levels of serum albumin and normalized protein catabolic rate (nPCR) <sup>33</sup> .                                                                                                                                                                                                                                     |
| Anemia and erythropoietin requirements                        | Average levels of hemoglobin, ferritin and transferrin saturation. The erythropoietin resistance index (units/week/kg/g/dl) will be calculated from average weekly erythropoietin dose (IU/week) divided by weight (kg) and then by hemoglobin level (g/dl).                                                                     |
| Bone-mineral metabolism                                       | Average levels of serum phosphorus, calcium and intact PTH levels; and average of weekly doses of active vitamin D and calcimimetic agents.                                                                                                                                                                                      |
| Vascular access                                               | Arteriovenous access (AVA) infiltration/hematoma, requirement of dialysis catheter in those who initiated HD with an AVA, AVA revision, AVA thrombosis, change of vascular access, and vascular access infection (bacteremia/sepsis related to vascular access, AVA cellulitis, catheter exit site or tunnel infection).         |
| Patient reported outcomes                                     | Health-related quality of life (HRQoL) will be measured using the Kidney Disease Quality of Life Short Form (KDQOL-SF) version 1.. and the Dialysis Symptom Index (DSI) <sup>34,35</sup> . Depression will be screened using the PHQ-9 instrument <sup>36,37</sup> . Anxiety will be assessed using the GAD-7 <sup>37,38</sup> . |

| <b>Supplementary Table 3. Participant Feedback Questionnaire</b>                                                                                                                  |                                          |                     |                    |                      |                     |
|-----------------------------------------------------------------------------------------------------------------------------------------------------------------------------------|------------------------------------------|---------------------|--------------------|----------------------|---------------------|
| <b>Dimensions and individual items within each dimension</b>                                                                                                                      | <b>Use the Scale to Rate the Answers</b> |                     |                    |                      |                     |
| <b>Information and communication</b>                                                                                                                                              |                                          |                     |                    |                      |                     |
| Overall study explained to my full understanding                                                                                                                                  | Definitely Yes                           | Probably Yes        | Probably No        | Definitely No        | I don't know        |
| Risks/benefits of joining the study explained                                                                                                                                     | Definitely Yes                           | Probably Yes        | Probably No        | Definitely No        | I don't know        |
| Study details were included in the informed consent docs                                                                                                                          | Definitely Yes                           | Probably Yes        | Probably No        | Definitely No        | I don't know        |
| Informed consent document was understandable                                                                                                                                      | Definitely Yes                           | Probably Yes        | Probably No        | Definitely No        | I don't know        |
| <b>Coordination of care</b>                                                                                                                                                       |                                          |                     |                    |                      |                     |
| Something happened that I was not well prepared for, which was related to the study                                                                                               | Definitely Yes                           | Probably Yes        | Probably No        | Definitely No        | I don't know        |
| Understood which tests were for research                                                                                                                                          | Definitely Yes                           | Probably Yes        | Probably No        | Definitely No        | I don't know        |
| <i>After the participant provides the answer, the interviewer will assess whether the participant had correct understanding urine collections were for research purposes only</i> | <i>Definitely Yes</i>                    | <i>Probably Yes</i> | <i>Probably No</i> | <i>Definitely No</i> | <i>I don't know</i> |
| Did you feel that your healthcare was compromised during the study?                                                                                                               | Definitely Yes                           | Probably Yes        | Probably No        | Definitely No        | I don't know        |
| Do you think the patients will need to be reminded every day about collecting the urine, during the period of urine collection, if the collection is longer than 1 day            | Definitely Yes                           | Probably Yes        | Probably No        | Definitely No        | I don't know        |
| <b>Perception on study-related assessments: urine collections</b>                                                                                                                 |                                          |                     |                    |                      |                     |
| During the study, did you feel that the urine collections were burdensome?                                                                                                        | Definitely Yes                           | Probably Yes        | Probably No        | Definitely No        | I don't know        |
| What do you think is the chance that a person might accidentally flush (or forget to collect) some of the urine voids when they need to collect the urine?                        | Very high                                | High                | Low                | Very Low             | I don't know        |
| Do you think the patients will disclose if they brought an incomplete urine collection?                                                                                           | Definitely Yes                           | Probably Yes        | Probably No        | Definitely No        | I don't know        |
| Do you think that collecting the urine every 2-3 months, for 1 or 2 years, would be manageable for most people on dialysis?                                                       | Definitely Yes                           | Probably Yes        | Probably No        | Definitely No        | I don't know        |
| <b>Motivation</b>                                                                                                                                                                 |                                          |                     |                    |                      |                     |
| Why did you choose to participate in this study?                                                                                                                                  |                                          |                     |                    |                      |                     |
| To contribute important information to medical science                                                                                                                            | Definitely Yes                           | Probably Yes        | Probably No        | Definitely No        | I don't know        |
| To potentially help other people with similar conditions                                                                                                                          | Definitely Yes                           | Probably Yes        | Probably No        | Definitely No        | I don't know        |
| I hoped that the research study would improve my medical condition                                                                                                                | Definitely Yes                           | Probably Yes        | Probably No        | Definitely No        | I don't know        |
| To gain insights into my own health                                                                                                                                               | Definitely Yes                           | Probably Yes        | Probably No        | Definitely No        | I don't know        |
| To benefit from the additional medical attention and testing that the study provided                                                                                              | Definitely Yes                           | Probably Yes        | Probably No        | Definitely No        | I don't know        |

|                                                                                                                                                                                                                                                                                                  |                |              |             |               |              |
|--------------------------------------------------------------------------------------------------------------------------------------------------------------------------------------------------------------------------------------------------------------------------------------------------|----------------|--------------|-------------|---------------|--------------|
| Because of the financial incentives of the study                                                                                                                                                                                                                                                 | Definitely Yes | Probably Yes | Probably No | Definitely No | I don't know |
| <b>Future studies</b>                                                                                                                                                                                                                                                                            |                |              |             |               |              |
| Do you think researchers should study <i>if</i> and <i>when</i> twice-a-week dialysis is safe?                                                                                                                                                                                                   | Definitely Yes | Probably Yes | Probably No | Definitely No | I don't know |
| <i>[If answer was 'Definitely Yes' or 'Probably Yes' to the above question]</i>                                                                                                                                                                                                                  |                |              |             |               |              |
| What do you think that the researchers should focus on when they study twice-a-week vs three-times a week dialysis? <i>[Rate in order of preference, from 1 being most preferred to be studied, to 5 being least preferred to be studied. Numbers 1 through 5 cannot be use more than twice]</i> |                |              |             |               |              |
| How long the patient survives                                                                                                                                                                                                                                                                    | 1              | 2            | 3           | 4             | 5            |
| How often the patient gets sick (e.g., feels short of breath, goes to ED, is admitted to the hospital)                                                                                                                                                                                           | 1              | 2            | 3           | 4             | 5            |
| How long the patient makes more than a cup of urine per day                                                                                                                                                                                                                                      | 1              | 2            | 3           | 4             | 5            |
| How satisfied the patients are with their quality of life                                                                                                                                                                                                                                        | 1              | 2            | 3           | 4             | 5            |
| Would you recommend joining a research study to other patients who are started on dialysis if they are eligible for such a study?                                                                                                                                                                | Definitely Yes | Probably Yes | Probably No | Definitely No | I don't know |
